# Supplementary material
Source: publisher figshare collection journal article supplement (https://gsapubs.figshare.com/articles/dataset/_/12541217)
Supplement: Supplementary file 1 [file 1]

Loughney, K.M., Hren, M.T., Smith, S.Y., and Pappas, J.L., 2019, Vegetation and habitat change in southern California through the Middle Miocene Climatic Optimum: Paleoenvironmental records from the Barstow Formation, Mojave Desert, USA: GSA Bulletin, <https://doi.org/10.1130/B35061.1>.

## Data Repository

Figure DR1. Results of  $\delta^{13}\text{C}_{nC29}$  and  $\delta\text{D}_{nC29}$  (closed circles) and  $\delta^{13}\text{C}_{nC31}$  and  $\delta\text{D}_{nC31}$  (open circles).

Figure DR2. Carbon-chain length abundances for  $n\text{C}_{25}$  through  $n\text{C}_{33}$  of 29  $n$ -alkane samples.

TABLE DR1. Age model of phytolith, biomarker, and soil organic matter (SOM) samples collected from the Barstow Formation. Sediment-accumulation rates (SAR) are from Loughney and Badgley (2017). Asterisks denote dated units that serve as tie points for age estimates. Coordinates are in WGS84.

TABLE DR2. Results of phytolith samples from the Barstow Formation. Counted assemblages noted with asterisks, and total number of morphotypes is given for the assemblage. Terminology follows Stromberg (2003). AQ—aquatic morphotypes; FI—forest indicator; GSSC—grass-silica short cell; CH—closed habitat; POOID-D—Poooid, diagnostic; POOID-ND—Poooid, nondiagnostic; PACMAD—Panicoideae, Arundinoideae, Chloridoideae, Micrairoideae, Aristoideae, Danthonioideae; PANI—Panicoideae; CHLOR—Chloridoideae; p—present; vab—very abundant. After Stromberg (2005).

TABLE DR3. Ecological tolerances and affinities of diatom taxa identified in phytolith samples from the Barstow Formation. Compiled from Lohman (1957), Lowe (1974), Gasse (1987), Round et al. (1990), Spaulding et al. (2010), Lange-Bertalot et al. (2011), Beals and Potapova (2013), and Owens et al. (2014).

TABLE DR4. Phytolith and isotopic results of six samples collected along a 106-m lateral transect in the Upper Member of the Barstow Formation. Percentage of forest indicator (FI), grass silica short cell (GSSC), and  $\text{C}_4$  phytolith morphotypes, average chain length (ACL),  $\delta^{13}\text{C}_{nC27-31}$ ,  $\delta\text{D}_{nC27-31}$ , and  $\delta^{13}\text{C}_{\text{SOM}}$  are given for each sample.

TABLE DR5. Carbon isotope results from soil organic matter, weight-percent carbon, estimated age of sample, and reconstructed atmospheric  $\delta^{13}\text{C}$  from Tipple et al. (2010). Reprocessed samples are indicated by number of runs, samples not included in results are in gray.

## SUPPLEMENTAL MATERIAL

### Age Model for Samples

Previous chronostratigraphic work in the Mud Hills and Calico Mountains has resulted in a robust age framework for the Barstow Formation (Woodburne et al., 1990; MacFadden et al., 1990; Singleton and Gans, 2008; Miller et al., 2013). We established stratigraphic control of sediment samples across Barstow outcrops through correlation of measured sections in the field and stratigraphic sections from Lindsay (1972), Woodburne et al. (1990), Lindsay (1995), Abersek and Lofgren (2017), and Loughney and Badgley (2017). Using uncompacted sediment-accumulation rates for each facies association from Loughney and Badgley (2017) and published ages of dated tuffs from MacFadden et al. (1990), Singleton and Gans (2008), and Miller et al. (2013) as tie points, we constructed an absolute age model for sediment samples. The estimated ages of samples are listed in Table S1. Because most samples in the Mud Hills were collected at or near fossil localities, we give approximate sampling location data.

### REFERENCES CITED

- Abersek, W.F., and Lofgren, D.L., 2017, Biostratigraphy of nonmarine Miocene gastropods from the Barstow Formation of California, *in* Reynolds, R.E., ed., ECSZ Does It: Revisiting the Eastern California Shear Zone: The 2017 Desert Symposium Field Guide and Proceedings: Zzyzx, California, California State University Desert Studies Consortium, p. 229–234.
- Lindsay, E.H., 1972, Small mammal fossils from the Barstow Formation, California: University of California Publications in Geological Sciences, v. 93, p. 1–104.
- Lindsay, E.H., 1995, *Copemys* and the Barstovian/Hemingfordian boundary: Journal of Vertebrate Paleontology, v. 15, no. 2, p. 357–365.
- Loughney, K.M., and Badgley, C., 2017, Facies, environments, and fossil preservation in the Barstow Formation, Mojave Desert, California: PALAIOS, v. 32, no. 6, p. 396–412.
- MacFadden, B.J., Swisher, C.C., III, Opdyke, N.D., and Woodburne, M.O., 1990, Paleomagnetism, geochronology, and possible tectonic rotation of the middle Miocene Barstow Formation, Mojave Desert, southern California: Geological Society of America Bulletin, v. 102, no. 4, p. 478–493.

- Miller, D.M., Rosario, J.E., Leslie, S.R., and Vazquez, J.A., 2013, Paleogeographic insights based on new U-Pb dates for altered tuffs in the Miocene Barstow Formation, California, *in* Reynolds, R.E., ed., *Raising Questions in the central Mojave Desert: The 2013 Desert Symposium Field Guide and Proceedings*: Zzyzx, California, California State University Desert Studies Consortium, p. 31–38.
- Singleton, J.S., and Gans, P.B., 2008, Structural and stratigraphic evolution of the Calico Mountains: Implications for early Miocene extension and Neogene transpression in the central Mojave Desert, California: *Geosphere*, v. 4, no. 3, p. 459–479.
- Woodburne, M.O., Tedford, R.H., and Swisher, C.C., III, 1990, Lithostratigraphy, biostratigraphy, and geochronology of the Barstow Formation, Mojave Desert, southern California: *Geological Society of America Bulletin*, v. 102, p. 459–477.

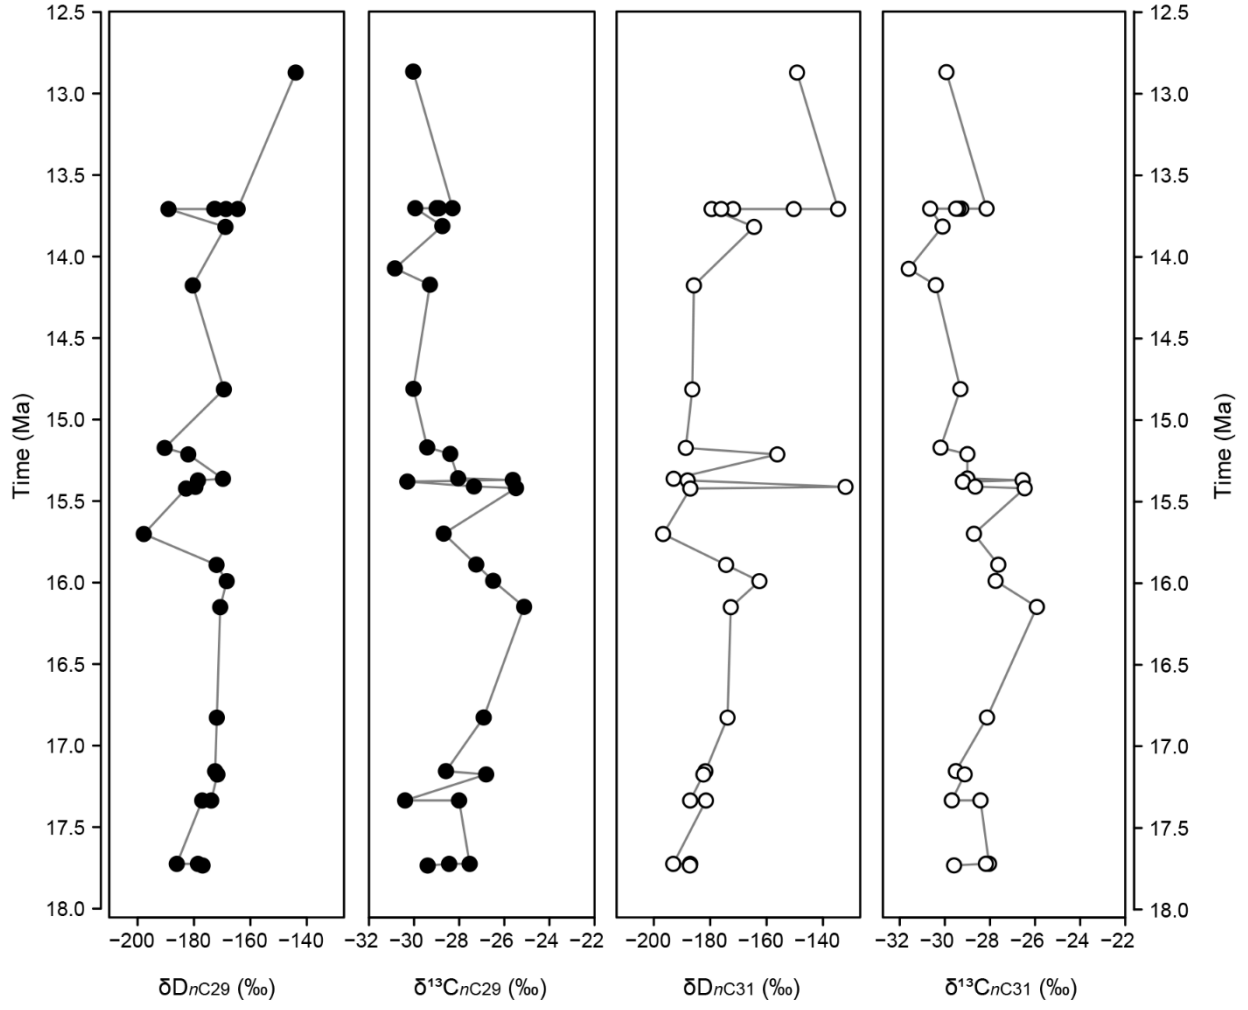

Figure DR1. Results of  $\delta^{13}C_{nC29}$  and  $\delta D_{nC29}$  (closed circles) and  $\delta^{13}C_{nC31}$  and  $\delta D_{nC31}$  (open circles).

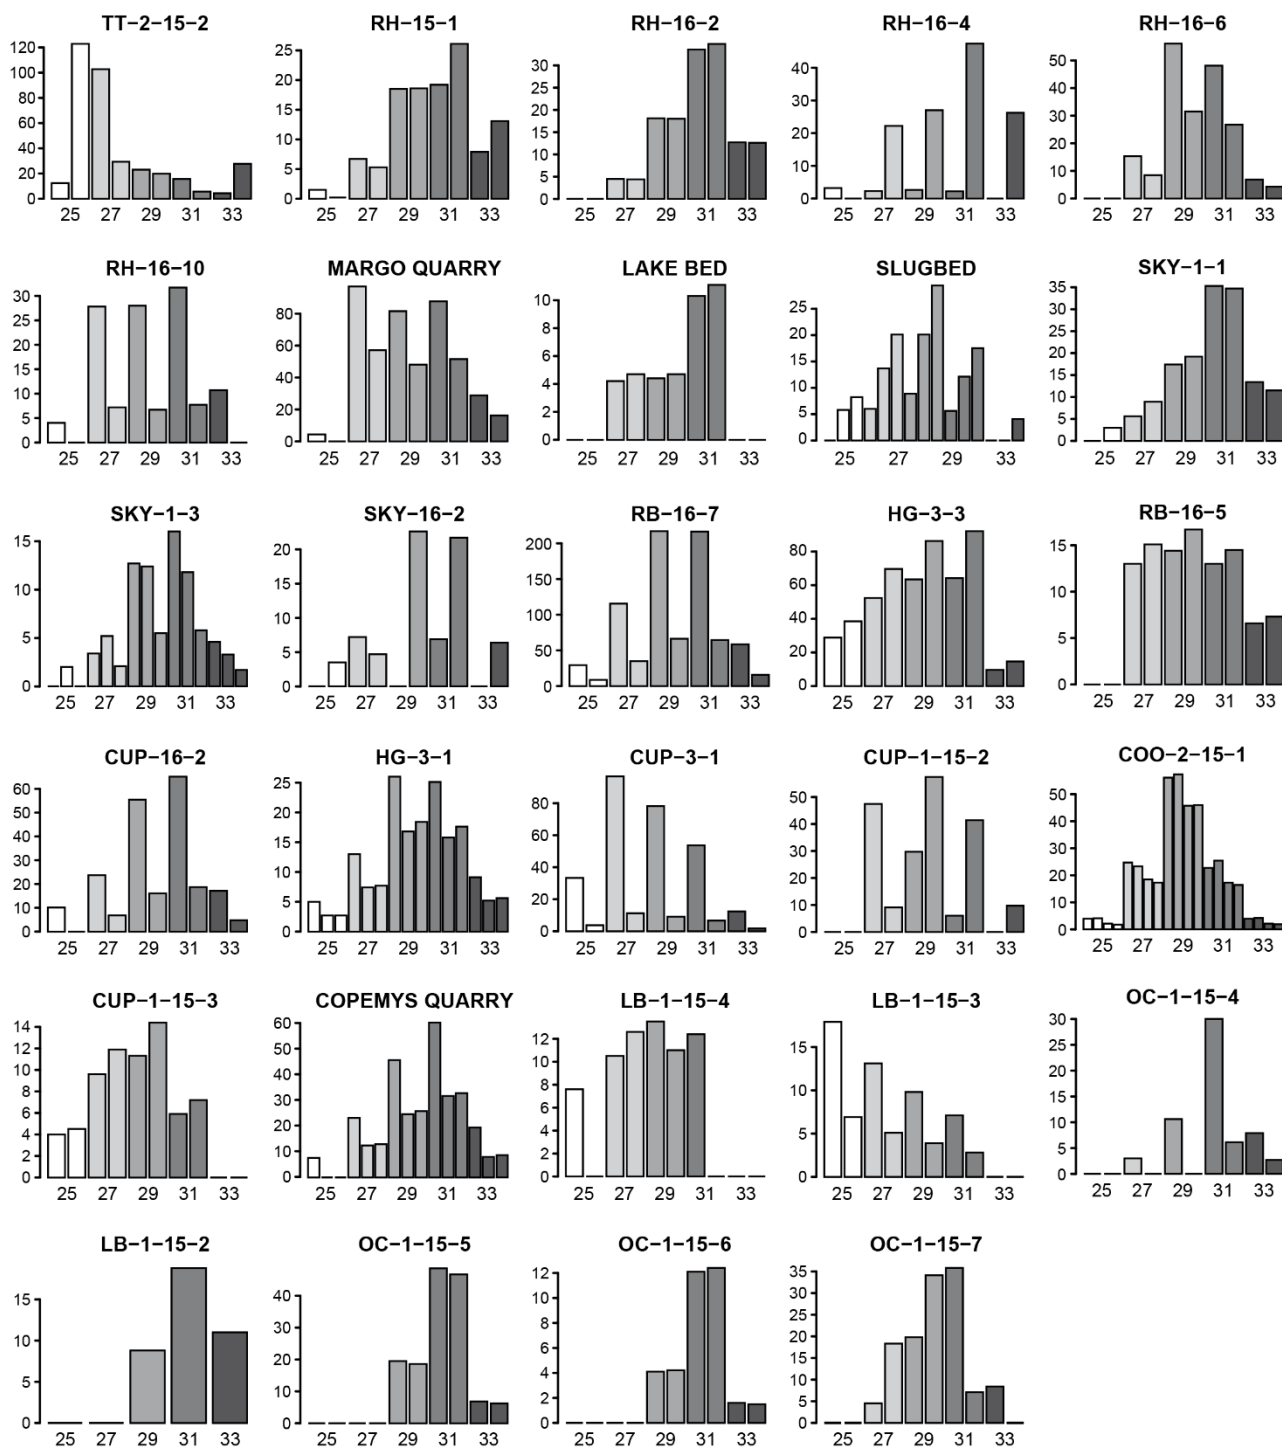

Figure DR2. Carbon-chain length abundances for  $nC_{25}$  through  $nC_{33}$  of 29  $n$ -alkane samples.

TABLE DR1. Age model of phytolith, biomarker, and soil organic matter (SOM) samples collected from the Barstow Formation. Sediment-accumulation rates (SAR) are from Loughney and Badgley (2017). Asterisks denote dated units that serve as tie points for age estimates. Coordinates are in WGS84.

| Sample number | Locality name    | Approximate coordinates | Composite stratigraphic level (m) | Sample type    | SAR (m/Myr) | Age preferred (Ma) | Age estimate (Ma) | Reference |
|---------------|------------------|-------------------------|-----------------------------------|----------------|-------------|--------------------|-------------------|-----------|
| TT-2-6        | Truck Top Quarry | 35.060°, -117.103°      | 1129.9                            | Phytolith, SOM | 154.1       | 12.86              | 12.864            |           |
| TT-2-7        | Truck Top Quarry | 35.060°, -117.103°      | 1129.9                            | Phytolith, SOM | 154.1       | 12.86              | 12.864            |           |
| TT-2-15-1     | Truck Top Wash   | 35.060°, -117.103°      | 1129.9                            | Biomarker      | 154.1       | 12.86              | 12.864            |           |
| TT-2-5        | Truck Top Wash   | 35.060°, -117.103°      | 1069.9                            | Phytolith      | 148.66      | 12.94              | 12.541            |           |
| TT-2-4        | Truck Top Wash   | 35.060°, -117.103°      | 1063.4                            | Phytolith      | 148.66      | 12.95              | 12.876            |           |
| TT-2-3        | Truck Top Wash   | 35.060°, -117.103°      | 1049.2                            | Phytolith, SOM | 148.66      | 12.97              | 12.850            |           |
| TT-2-1        | Truck Top Wash   | 35.060°, -117.103°      | 1020.9                            | Phytolith      | 148.66      | 12.98              | 12.910            |           |
| TT-2-2        | Truck Top Wash   | 35.060°, -117.103°      | 1002.9                            | Phytolith, SOM | 148.66      | 12.99              | 12.992            |           |
| TT-1-15-11    | Truck Top Wash   | 35.061°, -117.103°      | 999.4                             | Phytolith, SOM | 148.66      | 13.02              | 13.015            |           |
| TT-1-15-8     | Truck Top Wash   | 35.061°, -117.103°      | 998.9                             | Phytolith      | 148.66      | 13.02              | 13.019            |           |
| TT-1-2        | Truck Top Wash   | 35.061°, -117.103°      | 995.4                             | Phytolith      | 148.66      | 13.04              | 13.042            |           |
| TT-1-15-1     | Truck Top Wash   | 35.061°, -117.103°      | 994.5                             | Biomarker      | 148.66      | 13.05              | 13.048            |           |
| TT-1-15-2     | Truck Top Wash   | 35.061°, -117.103°      | 994.5                             | Phytolith      | 148.66      | 13.05              | 13.048            |           |
| TT-1-15-3     | Truck Top Wash   | 35.061°, -117.103°      | 994.5                             | Phytolith      | 148.66      | 13.05              | 13.048            |           |
| TT-1-15-4     | Truck Top Wash   | 35.061°, -117.103°      | 994.5                             | Phytolith      | 148.66      | 13.05              | 13.048            |           |
| TT-1-15-5     | Truck Top Wash   | 35.061°, -117.103°      | 994.5                             | Phytolith      | 148.66      | 13.05              | 13.048            |           |
| TT-1-15-6     | Truck Top Wash   | 35.061°, -117.103°      | 994.5                             | Phytolith      | 148.66      | 13.05              | 13.048            |           |
| TT-1-15-7     | Truck Top Wash   | 35.061°, -117.103°      | 994.5                             | Phytolith      | 148.66      | 13.05              | 13.048            |           |
| TT-1-1        | Truck Top Wash   | 35.061°, -117.103°      | 993.4                             | Phytolith, SOM | 148.66      | 13.06              | 13.055            |           |
| TT-1-15-10    | Truck Top Wash   | 35.061°, -117.103°      | 990.7                             | Phytolith      | 148.66      | 13.07              | 13.074            |           |
| TT-1-15-9     | Truck Top Wash   | 35.061°, -117.103°      | 981.7                             | Phytolith, SOM | 148.66      | 13.21              | 13.211            |           |
| FW-3B-2       | Falkenbach Wash  | 35.058°, -117.087°      | 953.5                             | Phytolith      | 148.66      | 13.26              | 13.327            |           |
| FW-3B-1       | Falkenbach Wash  | 35.058°, -117.087°      | 948.0                             | Phytolith      | 148.66      | 13.30              | 13.299            |           |

|                    |                        |                    |       |                |        |              |        |                         |
|--------------------|------------------------|--------------------|-------|----------------|--------|--------------|--------|-------------------------|
| *Lapilli Sandstone | Hell Gate Basin        |                    | 933.0 |                |        | *13.40 ± 0.2 |        | MacFadden et al. (1990) |
| HG-1-7             | Hell Gate Basin        | 35.052°, -117.068° | 900.0 | Phytolith      | 111.24 | 13.696       | 13.697 |                         |
| RH-16-1            | Rodent Hill Basin      | 35.047°, -117.077° | 898.0 | Phytolith, SOM | 148.66 | 13.70        | 13.679 |                         |
| RH-16-2            | Rodent Hill Basin      | 35.047°, -117.077° | 898.0 | biomarker      | 148.66 | 13.70        | 13.679 |                         |
| RH-16-3            | Rodent Hill Basin      | 35.047°, -117.077° | 898.0 | Phytolith, SOM | 148.66 | 13.70        | 13.679 |                         |
| RH-16-4            | Rodent Hill Basin      | 35.047°, -117.077° | 898.0 | Biomarker      | 148.66 | 13.70        | 13.679 |                         |
| RH-16-5            | Rodent Hill Basin      | 35.047°, -117.077° | 898.0 | Phytolith, SOM | 148.66 | 13.70        | 13.679 |                         |
| RH-16-6            | Rodent Hill Basin      | 35.047°, -117.077° | 898.0 | Biomarker      | 148.66 | 13.70        | 13.679 |                         |
| RH-16-7            | Rodent Hill Basin      | 35.047°, -117.077° | 898.0 | Phytolith, SOM | 148.66 | 13.70        | 13.679 |                         |
| RH-16-8            | Rodent Hill Basin      | 35.047°, -117.077° | 898.0 | Biomarker      | 148.66 | 13.70        | 13.679 |                         |
| RH-16-9            | Rodent Hill Basin      | 35.047°, -117.077° | 898.0 | Phytolith, SOM | 148.66 | 13.70        | 13.679 |                         |
| RH-16-10           | Rodent Hill Basin      | 35.047°, -117.077° | 898.0 | Biomarker      | 148.66 | 13.70        | 13.679 |                         |
| RH-15-1-1          | Rodent Hill Basin      | 35.047°, -117.077° | 898.0 | Phytolith, SOM | 148.66 | 13.70        | 13.679 |                         |
| RH-15-1-2          | Rodent Hill Basin      | 35.047°, -117.077° | 898.0 | Biomarker      | 148.66 | 13.70        | 13.679 |                         |
| OC-2-9             | Owl Canyon             | 35.022°, -117.024° | 895.5 | Phytolith, SOM | 119.85 | 13.72        | 13.717 |                         |
| HG-1-6             | Hell Gate Basin        | 35.052°, -117.068° | 881.0 | Phytolith, SOM | 119.85 | 13.77        | 13.766 |                         |
| CARN-16-4          | Margo Quarry           | 35.053°, -117.082° | 875.0 | Biomarker      | 119.85 | 13.81        | 13.816 |                         |
| HG-1-4             | Hell Gate Basin        | 35.052°, -117.068° | 873.0 | Phytolith, SOM | 109.51 | 13.82        | 13.817 |                         |
| OC-1-7             | Owl Canyon             | 35.039°, -117.025° | 867.5 | Phytolith      | 85.08  | 13.87        | 13.866 |                         |
| HG-16-7            | Sunnyside Quarry       | 35.050°, -117.073° | 860.0 | Phytolith, SOM | 111.24 | 13.94        | 13.937 |                         |
| HG-1-3             | Hell Gate Basin        | 35.052°, -117.068° | 860.0 | Phytolith      | 111.24 | 13.94        | 13.937 |                         |
| *Hemicyon Tuff     |                        |                    | 853.0 |                |        | *14.00 ± 0.1 |        | MacFadden et al. (1990) |
| FW-3-11            | Falkenbach Wash        | 35.058°, -117.087° | 851.5 | Phytolith      | 148.66 | 14.01        | 14.010 |                         |
| FW-3-10            | Falkenbach Wash        | 35.058°, -117.087° | 850.5 | Phytolith      | 148.66 | 14.02        | 14.017 |                         |
| FW-1-15-2          | Falkenbach Wash Quarry | 35.058°, -117.084° | 850.0 | Biomarker      | 119.85 | 14.03        | 14.025 |                         |
| FW-3-15-4          | Falkenbach Wash        | 35.058°, -117.087° | 846.0 | Biomarker      | 119.85 | 14.06        | 14.058 |                         |

|                  |                          |                    |       |                   |        |              |        |                                                 |
|------------------|--------------------------|--------------------|-------|-------------------|--------|--------------|--------|-------------------------------------------------|
| FE-16-7          | Lake Bed Quarry          | 35.044°, -117.071° | 843.9 | Biomarker         | 148.66 | 14.07        | 14.067 |                                                 |
| HG-1-2           | Hell Gate Basin          | 35.052°, -117.068° | 839.0 | Phytolith         | 111.24 | 14.12        | 14.126 |                                                 |
| FW-3-9           | Falkenbach Wash          | 35.058°, -117.087° | 839.0 | Phytolith,<br>SOM | 111.24 | 14.12        | 14.126 |                                                 |
| FW-3-8           | Falkenbach Wash          | 35.058°, -117.087° | 834.0 | SOM               | 148.66 | 14.13        | 14.128 |                                                 |
| FE-16-9          | Slugbed Quarry           | 35.042°, -117.069° | 828.3 | Biomarker         | 148.66 | 14.17        | 14.166 |                                                 |
| FW-3-5           | Falkenbach Wash          | 35.058°, -117.087° | 809.5 | Phytolith         | 148.66 | 14.30        | 14.293 |                                                 |
| FW-3-7           | Falkenbach Wash          | 35.058°, -117.087° | 811.8 | Phytolith         | 128.53 | 14.32        | 14.321 |                                                 |
| FW-3-6           | Falkenbach Wash          | 35.058°, -117.087° | 810.0 | Phytolith,<br>SOM | 128.53 | 14.33        | 14.335 |                                                 |
| HG-1-1           | Hell Gate Basin          | 35.052°, -117.068° | 818.0 | Phytolith,<br>SOM | 100.97 | 14.35        | 14.347 |                                                 |
| OC-1-6           | Owl Canyon               | 35.039°, -117.025° | 825.5 | Phytolith         | 85.08  | 14.55        | 14.548 |                                                 |
| FE-16-10         | Fuller's Earth<br>Canyon | 35.041°, -117.072° | 813.0 | Phytolith         | 148.66 | 14.71        | 14.706 |                                                 |
| FW-3-4           | Falkenbach Wash          | 35.058°, -117.087° | 800.5 | Phytolith         | 148.66 | 14.79        | 14.790 |                                                 |
| *Dated Tuff      |                          |                    | 799.0 |                   |        | *14.80 ± 0.1 |        | MacFadden et al.<br>(1990)                      |
| OC-2-8           | Owl Canyon               | 35.022°, -117.024° | 799.0 | Phytolith         | 85.08  | 14.80        | 14.800 |                                                 |
| SKY-1-1          | Skyline                  | 35.034°, -117.052° | 798.1 | Biomarker         | 85.08  | 14.81        | 14.809 |                                                 |
| SKY-1-2          | Skyline                  | 35.034°, -117.052° | 798.1 | Phytolith         | 85.08  | 14.81        | 14.809 |                                                 |
| FE-16-5          | RAM V98004               | 35.042°, -117.065° | 798.0 | Phytolith,<br>SOM | 148.66 | 14.81        | 14.807 |                                                 |
| FW-2-3           | Falkenbach Wash          | 35.058°, -117.085° | 776.5 | Phytolith         | 119.85 | 15.15        | 15.146 |                                                 |
| SKY-1-5          | Skyline                  | 35.034°, -117.052° | 775.9 | Biomarker         | 119.85 | 15.15        | 15.146 |                                                 |
| SKY-1-4          | Skyline                  | 35.034°, -117.052° | 774.4 | Phytolith,<br>SOM | 119.85 | 15.16        | 15.163 |                                                 |
| SKY-1-3          | Skyline                  | 35.034°, -117.052° | 773.9 | Biomarker         | 119.85 | 15.17        | 15.167 |                                                 |
| FW-3-3           | Falkenbach Wash          | 35.058°, -117.087° | 773.5 | Phytolith         | 119.85 | 15.17        | 15.171 |                                                 |
| FW-3-2           | Falkenbach Wash          | 35.058°, -117.087° | 771.5 | Phytolith,<br>SOM | 119.85 | 15.19        | 15.187 |                                                 |
| *Skyline<br>Tuff |                          |                    | 770.0 |                   |        | *15.20       |        | D.M. Miller,<br>written commun.,<br>April, 2016 |
| OC-2-7           | Owl Canyon               | 35.022°, -117.024° | 770.0 | Phytolith,<br>SOM | 72.5   | 15.20        | 15.200 |                                                 |
| FW-1-1           | Falkenbach Wash          | 35.058°, -117.084° | 769.8 | Phytolith,<br>SOM | 119.85 | 15.20        | 15.202 |                                                 |
| FW-2-2           | Falkenbach Wash          | 35.058°, -117.085° | 769.7 | Phytolith         | 119.85 | 15.20        | 15.203 |                                                 |



|                   |                                |                    |       |                   |        |              |        |                            |
|-------------------|--------------------------------|--------------------|-------|-------------------|--------|--------------|--------|----------------------------|
| SKY-16-2          | Skyline Quarry                 | 35.034°, -117.052° | 768.0 | Biomarker         | 327.57 | 15.21        | 15.206 |                            |
| FW-3-1            | Falkenbach Wash                | 35.058°, -117.087° | 764.8 | Phytolith         | 119.85 | 15.24        | 15.243 |                            |
| RB-16-7           | Saucer Butte                   | 35.034°, -117.033° | 740.0 | Biomarker         | 204.13 | 15.30        | 15.347 |                            |
| FW-2-15-3         | Falkenbach Wash                | 35.058°, -117.085° | 755.5 | Phytolith,<br>SOM | 119.85 | 15.32        | 15.321 |                            |
| FW-2-15-4         | Falkenbach Wash                | 35.058°, -117.085° | 755.5 | Biomarker         | 119.85 | 15.32        | 15.321 |                            |
| FW-2-15-2         | Falkenbach Wash                | 35.058°, -117.085° | 755.0 | Phytolith         | 119.85 | 15.32        | 15.325 |                            |
| FW-2-15-1         | Falkenbach Wash                | 35.058°, -117.085° | 751.5 | Phytolith,<br>SOM | 119.85 | 15.33        | 15.354 |                            |
| OC-2-6            | Owl Canyon                     | 35.022°, -117.024° | 731.0 | Phytolith,<br>SOM | 286.19 | 15.34        | 15.336 |                            |
| HG-3-4            | Hell Gate Basin                | 35.053°, -117.066° | 715.7 | Phytolith         | 100.97 | 15.37        | 15.360 |                            |
| HG-3-3            | Hell Gate Basin                | 35.053°, -117.066° | 715.3 | Biomarker         | 100.97 | 15.37        | 15.364 |                            |
| RB-16-5-1         | Valley View Quarry             | 35.030°, -117.042° | 710.0 | Biomarker         | 327.57 | 15.38        | 15.383 |                            |
| RB-16-5-2         | Valley View Quarry             | 35.030°, -117.042° | 710.0 | SOM               | 327.57 | 15.38        | 15.383 |                            |
| OC-2-5            | Owl Canyon                     | 35.022°, -117.024° | 694.0 | Phytolith,<br>SOM | 327.57 | 15.387       | 15.432 |                            |
| CUP-16-5-1        | RAM V94179                     | 35.031°, -117.051° | 700   | SOM               | 327.57 | 15.41        | 15.414 |                            |
| CUP-16-5-2        | RAM V94179                     | 35.031°, -117.051° | 700.0 | Biomarker         | 327.57 | 15.41        | 15.414 |                            |
| HG-3-1            | Hell Gate Basin                | 35.053°, -117.066° | 696.1 | Biomarker         | 111.24 | 15.42        | 15.419 |                            |
| HG-3-2            | Hell Gate Basin                | 35.053°, -117.066° | 696.1 | Phytolith,<br>SOM | 111.24 | 15.42        | 15.419 |                            |
| OC-2-4            | Owl Canyon                     | 35.022°, -117.024° | 637.0 | Phytolith         | 580.83 | 15.46        | 15.429 |                            |
| OC-2-3            | Owl Canyon                     | 35.022°, -117.024° | 610.5 | Phytolith,<br>SOM | 580.83 | 15.50        | 15.473 |                            |
| OC-2-1            | Owl Canyon                     | 35.022°, -117.024° | 524.0 | Phytolith,<br>SOM | 580.83 | 15.70        | 15.622 |                            |
| CUP-3-1           | Camp Quarry                    | 35.027°, -117.048° | 523.5 | Biomarker         | 286.19 | 15.70        | 15.704 |                            |
| CUP-3-2           | Camp Quarry                    | 35.027°, -117.048° | 523.5 | Phytolith,<br>SOM | 286.19 | 15.70        | 15.704 |                            |
| *Oreodont<br>Tuff |                                |                    | 496.0 |                   |        | *15.80 ± 0.2 |        | MacFadden et al.<br>(1990) |
| CUP-1-14          | Cal-Uranium<br>Prospect Canyon | 35.025°, -117.048° | 482.0 | Phytolith         | 286.19 | 15.85        | 15.849 |                            |
| CUP-1-13          | Cal-Uranium<br>Prospect Canyon | 35.025°, -117.048° | 480.2 | Phytolith,<br>SOM | 286.19 | 15.86        | 15.855 |                            |
| CUP-1-12          | Cal-Uranium<br>Prospect Canyon | 35.025°, -117.048° | 469.0 | Phytolith         | 286.19 | 15.89        | 15.894 |                            |

|                 |                             |                    |        |                |        |              |        |                           |
|-----------------|-----------------------------|--------------------|--------|----------------|--------|--------------|--------|---------------------------|
| CUP-1-15-2      | Cal-Uranium Prospect Canyon | 35.025°, -117.048° | 469.0  | Biomarker      | 286.19 | 15.89        | 15.894 |                           |
| CUP-1-11        | Cal-Uranium Prospect Canyon | 35.025°, -117.048° | 468.0  | Phytolith      | 286.19 | 15.91        | 15.898 |                           |
| CUP-1-9         | Cal-Uranium Prospect Canyon | 35.025°, -117.048° | 459.0  | Phytolith, SOM | 286.19 | 15.93        | 15.929 |                           |
| CUP-1-8         | Cal-Uranium Prospect Canyon | 35.025°, -117.048° | 457.0  | Phytolith      | 286.19 | 15.94        | 15.936 |                           |
| COO-2-15-2      | Steepside Quarry            | 35.032°, -117.060° | 456.0  | Phytolith      | 204.13 | 15.99        | 15.996 |                           |
| COO-2-15-1      | Steepside Quarry            | 35.032°, -117.060° | 456.0  | Biomarker      | 204.13 | 15.99        | 15.996 |                           |
| CUP-1-7         | Cal-Uranium Prospect Canyon | 35.025°, -117.048° | 425.5  | Phytolith      | 286.19 | 16.05        | 16.046 |                           |
| CUP-1-6         | Cal-Uranium Prospect Canyon | 35.025°, -117.048° | 399.0  | Phytolith      | 286.19 | 16.14        | 16.139 |                           |
| CUP-1-15-3      | Cal-Uranium Prospect Canyon | 35.025°, -117.048° | 394.5  | Biomarker      | 286.19 | 16.15        | 16.155 |                           |
| CUP-1-18        | Cal-Uranium Prospect Canyon | 35.025°, -117.048° | 390.5  | SOM            | 286.19 | 16.17        | 16.169 |                           |
| CUP-1-5         | Cal-Uranium Prospect Canyon | 35.025°, -117.048° | 373.0  | Phytolith, SOM | 286.19 | 16.23        | 16.230 |                           |
| CUP-1-5 alt     | Cal-Uranium Prospect Canyon | 35.025°, -117.048° | 373.0  | Phytolith      | 286.19 | 16.23        | 16.230 |                           |
| CUP-1-4-2       | Cal-Uranium Prospect Canyon | 35.025°, -117.048° | 360.0  | Phytolith, SOM | 286.19 | 16.28        | 16.275 |                           |
| *Rak Tuff       |                             |                    | 198.0  |                | 286.19 | *16.30 ± 0.3 |        | MacFadden et al. (1990)   |
| CUP-1-4-1       | Cal-Uranium Prospect Canyon | 35.025°, -117.048° | 340.5  | Phytolith, SOM | 286.19 | 16.34        | 16.343 |                           |
| CUP-1-1         | Cal-Uranium Prospect Canyon | 35.025°, -117.048° | 320.5  | Phytolith      | 286.19 | 16.41        | 16.413 |                           |
| CUP-1-15-1      | Cal-Uranium Prospect Canyon | 35.025°, -117.048° | 316.0  | Biomarker      | 286.19 | 16.42        | 16.429 |                           |
| CUP-1-21B       | Rainbow Loop Flora locality | 35.025°, -117.048° | 316.0  | Phytolith      | 286.19 | 16.42        | 16.429 |                           |
| COO-1-15-2      | <i>Copemys</i> Quarry       | 35.028°, -117.067° | 266.5  | Phytolith, SOM | 309.22 | 16.83        | 16.828 |                           |
| COO-1-15-1      | <i>Copemys</i> Quarry       | 35.028°, -117.067° | 266.5  | Biomarker      | 309.22 | 16.83        | 16.828 |                           |
| *Dacite breccia |                             |                    | -175.0 |                |        | *17.00 ± 0.5 |        | Singleton and Gans (2008) |

|              |                     |                    |        |                   |        |              |        |                      |
|--------------|---------------------|--------------------|--------|-------------------|--------|--------------|--------|----------------------|
| LB-1-11      | Little Borate       | 34.951°, -116.820° | -170.5 | Phytolith         | 534.69 | 17.02        | 17.005 |                      |
| OC-1-5       | Owl Canyon          | 35.039°, -117.025° | 146.0  | Phytolith         | 306.24 | 17.06        | 17.058 |                      |
| RDQ-2        | Red Division Quarry | 35.025°, -117.058° | 180.0  | Biomarker         | 309.22 | 17.11        | 17.108 |                      |
| RDQ-1        | Red Division Quarry | 35.025°, -117.058° | 168.0  | Phytolith         | 309.22 | 17.11        | 17.147 |                      |
| OC-1-4       | Owl Canyon          | 35.039°, -117.025° | 120.5  | Phytolith,<br>SOM | 306.24 | 17.14        | 17.143 |                      |
| LB-1-15-4    | Little Borate       | 34.952°, -116.820° | -252.0 | Biomarker         | 534.69 | 17.16        | 17.160 |                      |
| LB-1-6       | Little Borate       | 34.952°, -116.821° | -252.0 | Phytolith         | 534.69 | 17.16        | 17.160 |                      |
| RDQ-3        | Red Division Quarry | 35.025°, -117.058° | 163.0  | Phytolith         | 309.22 | 17.16        | 17.163 |                      |
| RDQ-4        | Red Division Quarry | 35.025°, -117.058° | 163.0  | Biomarker         | 309.22 | 17.16        | 17.163 |                      |
| LB-1-15-3    | Little Borate       | 34.953°, -116.819° | -262.0 | Biomarker         | 534.69 | 17.18        | 17.178 |                      |
| LB-1-5       | Little Borate       | 34.952°, -116.820° | -262.0 | Phytolith,<br>SOM | 534.69 | 17.18        | 17.178 |                      |
| LB-1-3       | Little Borate       | 34.953°, -116.819° | -295.5 | Phytolith         | 534.69 | 17.24        | 17.225 |                      |
| LB-1-2       | Little Borate       | 34.954°, -116.819° | -306.5 | Phytolith         | 534.69 | 17.26        | 17.261 |                      |
| OC-1-15-1    | Owl Canyon          | 35.039°, -117.025° | 69.0   | Phytolith         | 309.22 | 17.29        | 17.291 |                      |
| OC-1-15-2    | Owl Canyon          | 35.039°, -117.025° | 69.0   | Phytolith,<br>SOM | 309.22 | 17.29        | 17.291 |                      |
| OC-1-15-3    | Owl Canyon          | 35.039°, -117.025° | 68.0   | Biomarker         | 309.22 | 17.29        | 17.294 |                      |
| OC-1-3       | Owl Canyon          | 35.039°, -117.025° | 69.0   | Phytolith,<br>SOM | 309.22 | 17.29        | 17.291 |                      |
| OC-1-15-4    | Owl Canyon          | 35.039°, -117.025° | 54.0   | Biomarker         | 309.22 | 17.34        | 17.339 |                      |
| OC-1-2       | Owl Canyon          | 35.039°, -117.025° | 54.0   | Phytolith         | 309.22 | 17.34        | 17.341 |                      |
| OC-1-1 B     | Owl Canyon          | 35.039°, -117.025° | 53.5   | Phytolith,<br>SOM | 309.22 | 17.34        | 17.341 |                      |
| LB-1-15-2    | Little Borate       | 34.954°, -116.817° | -352.0 | Biomarker         | 534.69 | 17.34        | 17.347 |                      |
| LB-1-1       | Little Borate       | 34.954°, -116.817° | -352.0 | Phytolith         | 534.69 | 17.35        | 17.347 |                      |
| LB-1-15-1    | Little Borate       | 34.955°, -116.813° | -463.5 | Phytolith         | 534.69 | 17.55        | 17.555 |                      |
| LB-1-9       | Little Borate       | 34.955°, -116.813° | -463.5 | Phytolith,<br>SOM | 534.69 | 17.55        | 17.555 |                      |
| LB-1-8       | Little Borate       | 34.955°, -116.813° | -488.0 | Phytolith         | 534.69 | 17.60        | 17.599 |                      |
| *Calico tuff | Little Borate       |                    | -487.5 |                   |        | *17.60 ± 0.2 |        | Miller et al. (2013) |
| OC-1-15-5    | Owl Canyon          | 35.039°, -117.025° | -67.5  | Biomarker         | 309.22 | 17.73        | 17.731 |                      |
| OC-1-15-6    | Owl Canyon          | 35.039°, -117.025° | -67.5  | Biomarker         | 309.22 | 17.73        | 17.731 |                      |
| OC-1-15-7    | Owl Canyon          | 35.039°, -117.025° | -69.0  | Biomarker         | 309.22 | 17.74        | 17.738 |                      |

TABLE DR3. Ecological tolerances and affinities of diatom taxa identified in phytolith samples from the Barstow Formation. Compiled from Lohman (1957), Lowe (1974), Gasse (1987), Round et al. (1990), Spaulding et al. (2010), Lange-Bertalot et al. (2011), Beals and Potapova (2013), and Owen et al. (2004).

| Taxon                                  | Habitat tolerances                                                              | Ecology                                                             | Preferred environment                         |
|----------------------------------------|---------------------------------------------------------------------------------|---------------------------------------------------------------------|-----------------------------------------------|
| <i>Anomoeoneis</i> sp.                 | pH: 7 to >8.5<br>Hypersaline to freshwater<br>Eutrophic to oligotrophic         | Epipellic, periphytic<br>Rheophilic to indifferent                  | Lakes, ponds, streams, and intermittent pools |
| <i>Aulacoseira granulata</i>           | pH: 7 to 8.5<br>Freshwater (some salt)<br>Eutrophic                             | Planktonic                                                          | Ponds and lakes                               |
| <i>Caloneis bacillum</i>               | pH: 7 to 8.5<br>Brackish to freshwater (some salt)                              | Benthic, periphytic                                                 | Streams, springs, intermittent wetlands       |
| <i>Cymboplectura</i> cf. <i>heinii</i> | Freshwater                                                                      | Benthic, epipellic                                                  | Ponds and lakes                               |
| <i>Epithemia adnata</i>                | pH: 7 to >8.5<br>Freshwater (some salt)                                         | Epiphytic, periphytic,<br>Rheophilic to limnophilic                 | Streams, ponds, and lakes                     |
| <i>Eucocconeis laevis</i>              | pH: ~7<br>Freshwater<br>Oligotrophic                                            | Benthic, epipellic                                                  | Ponds and lakes                               |
| <i>Eunotia</i> cf. <i>arcuoides</i>    | pH: 5.5 to ~7<br>Freshwater (no salt to some salt)<br>Eutrophic to oligotrophic | Periphytic<br>Limnobiontic to aerophilic                            | Lakes, ponds, and soil                        |
| <i>Fragilaria nevadensis</i>           | pH: 7 to 8.5<br>Freshwater (no salt to some salt)<br>Eutrophic to mesotrophic   | Periphytic, epilithic,<br>planktonic<br>Limnobiontic to indifferent | Streams, lakes, ponds, and springs            |
| ? <i>Frustulia</i>                     | Freshwater (no salt to some salt)                                               | Benthic, periphytic                                                 | Streams, lakes, and bogs                      |
| <i>Hantzschia amphioxys</i>            | pH: 7 to 8.5<br>Freshwater (some salt)                                          | Periphytic, aerophilic                                              | Ephemeral pools, moist soil                   |
| <i>Hippodonta</i> cf. <i>coxiae</i>    | Freshwater (some salt)                                                          | Benthic                                                             | Ponds and lakes                               |
| <i>Luticola mutica</i>                 | pH: 6.5 to 8.5<br>Freshwater (no salt to some salt)<br>Eutrophic to mesotrophic | Periphytic, aerophilic                                              | Streams, springs, and moist soil              |
| <i>Nitzschia recta</i>                 | pH: >7<br>Freshwater (some salt)                                                | Epipellic                                                           | Ponds and lakes                               |
| <i>Nitzschia</i> , large form          | pH: 7 to >8.5<br>Freshwater (some salt)                                         | Periphytic, rheophilic,<br>crenophilic, or limnophilic              | Streams, springs, ponds, and lakes            |
| <i>Nitzschia</i> or <i>Hantzschia</i>  | pH: >7<br>Freshwater (some salt)                                                |                                                                     | Streams, ponds, lakes, or soil                |
| <i>Pinnularia borealis</i>             | pH: ~7<br>Freshwater (some salt)<br>Eutrophic                                   | Periphytic, aerophilic                                              | Streams, ponds, lakes, and soil               |
| <i>Pinnularia brebissonii</i>          | pH: <7 to >7<br>Freshwater                                                      | Benthic                                                             | Ponds, lakes, and marshes                     |
| <i>Sellaphora bacilloides</i>          | pH: ~7<br>Freshwater                                                            | Benthic                                                             | Ponds, lakes, and low-gradient streams        |

TABLE DR4. Phytolith and isotopic results of six samples collected along a 106-m lateral transect in the Upper Member of the Barstow Formation. Percentage of forest indicator (FI), grass silica short cell (GSSC), and C<sub>4</sub> phytolith morphotypes, average chain length (ACL),  $\delta^{13}\text{C}_{nC27-31}$ ,  $\delta\text{D}_{nC27-31}$ , and  $\delta^{13}\text{C}_{\text{SOM}}$  are given for each sample.

| Sample  | FI (%) <sup>*</sup> | GSSC (%) <sup>*</sup> | C <sub>4</sub> GSSC (%) <sup>†</sup> | ACL  | $\delta^{13}\text{C}_{nC27-31}$ | $\delta\text{D}_{nC27-31}$ | $\delta^{13}\text{C}_{\text{SOM}}$ |
|---------|---------------------|-----------------------|--------------------------------------|------|---------------------------------|----------------------------|------------------------------------|
| RH-15-1 | 30.5                | 69.1                  | 26.0                                 | 30.2 | -29.0                           | -175.5                     | -18.5                              |
| RH-16-1 | 33.3                | 66.5                  | 11.7                                 | 30.6 | -29.2                           | -164.9                     | -21.9                              |
| RH-16-3 | 23.6                | 75.8                  | 7.9                                  | 29.1 | -28.3                           | -179.3                     | -22.1                              |
| RH-16-5 | -                   | -                     | -                                    | 29.8 | -30.3                           | -172.5                     | -21.6                              |
| RH-16-7 | 76.9                | 22.8                  | 3.3                                  | -    | -                               | -                          | -22.1                              |
| RH-16-9 | -                   | -                     | -                                    | 29.2 | -29.3                           | -163.5                     | -22.5                              |

<sup>\*</sup>Percent of phytolith count total  
<sup>†</sup>Percent of GSSC total

TABLE DR5. Carbon isotope results from soil organic matter, weight-percent carbon, estimated age of sample, and reconstructed atmospheric  $\delta^{13}\text{C}$  from Tipple et al. (2010). Reprocessed samples are indicated by number of runs, samples not included in results are in gray.

| Sample No.    | Member     | Age (Ma) | $\delta^{13}\text{C}_{\text{VPDB}}$ (‰) | Weight % C | $\delta^{13}\text{C}_{\text{atm}}$ (‰) |
|---------------|------------|----------|-----------------------------------------|------------|----------------------------------------|
| TT-2-6        | Upper      | 12.86    | -19.34                                  | 0.03       | -5.93                                  |
| TT-2-7        | Upper      | 12.86    | -22.19                                  | 0.03       | -5.93                                  |
| TT-2-3        | Upper      | 12.97    | -23.64                                  | 0.02       | -5.91                                  |
| TT-2-2        | Upper      | 12.99    | -23.63                                  | 0.05       | -5.91                                  |
| TT-1-15-11    | Upper      | 13.02    | -23.07                                  | 0.02       | -5.91                                  |
| TT-1-1        | Upper      | 13.06    | -21.16                                  | 0.03       | -5.91                                  |
| TT-1-15-9     | Upper      | 13.21    | -21.44                                  | 0.04       | -5.90                                  |
| RH-15-1 run 1 | Upper      | 13.69    | -18.52                                  | 0.06       | -5.80                                  |
| RH-15-1 run 2 | Upper      | 13.69    | -16.85                                  | 0.04       | -5.80                                  |
| RH-16-1       | Upper      | 13.69    | -21.92                                  | 0.04       | -5.80                                  |
| RH-16-3       | Upper      | 13.69    | -22.07                                  | 0.04       | -5.80                                  |
| RH-16-5       | Upper      | 13.69    | -21.64                                  | 0.07       | -5.80                                  |
| RH-16-7       | Upper      | 13.69    | -22.08                                  | 0.05       | -5.80                                  |
| RH-16-9       | Upper      | 13.69    | -22.48                                  | 0.06       | -5.80                                  |
| OC-2-9        | Upper      | 13.72    | -21.95                                  | 0.13       | -5.79                                  |
| HG-1-6 run 1  | Upper      | 13.77    | -18.18                                  | 0.19       | -5.79                                  |
| HG-1-6 run 2  | Upper      | 13.77    | -20.49                                  | 0.07       | -5.79                                  |
| HG-1-4        | Upper      | 13.82    | -20.66                                  | 0.12       | -5.77                                  |
| HG-16-7       | Upper      | 13.94    | -24.74                                  | 0.04       | -5.74                                  |
| FW-3-9        | Upper      | 14.12    | -22.84                                  | 0.05       | -5.66                                  |
| FW-3-8        | Upper      | 14.13    | -21.26                                  | 0.09       | -5.65                                  |
| FW-3-6        | Upper      | 14.33    | -25.53                                  | 0.04       | -5.55                                  |
| HG-1-1        | Upper      | 14.35    | -23.82                                  | 0.06       | -5.53                                  |
| FE-16-5       | Upper      | 14.81    | -23.34                                  | 0.02       | -5.29                                  |
| SKY-1-4       | Upper      | 15.16    | -22.86                                  | 0.02       | -5.27                                  |
| FW-3-2        | Upper      | 15.19    | -26.08                                  | 0.08       | -5.27                                  |
| OC-2-7        | Upper      | 15.20    | -24.57                                  | 0.14       | -5.27                                  |
| FW-1-1        | Upper      | 15.20    | -24.51                                  | 0.05       | -5.27                                  |
| FW-2-15-3     | Middle     | 15.32    | -24.03                                  | 0.04       | -5.27                                  |
| FW-2-15-1     | Middle     | 15.33    | -23.22                                  | 0.11       | -5.26                                  |
| OC-2-6        | Middle     | 15.34    | -21.41                                  | 0.12       | -5.26                                  |
| OC-2-5        | Middle     | 15.39    | -20.62                                  | 0.08       | -5.26                                  |
| CUP-16-5-1    | Middle     | 15.41    | -23.23                                  | 0.03       | -5.26                                  |
| HG-3-2        | Middle     | 15.42    | -23.09                                  | 0.12       | -5.27                                  |
| OC-2-3        | Middle     | 15.50    | -24.65                                  | 0.12       | -5.25                                  |
| OC-2-1        | Middle     | 15.70    | -22.89                                  | 0.07       | -5.26                                  |
| CUP-3-2       | Middle     | 15.70    | -21.33                                  | 0.27       | -5.26                                  |
| CUP-1-13      | Middle     | 15.86    | -23.34                                  | 0.03       | -5.26                                  |
| CUP-1-9       | Middle     | 15.93    | -22.84                                  | 0.07       | -5.29                                  |
| CUP-1-5       | Middle     | 16.23    | -22.29                                  | 0.17       | -5.33                                  |
| CUP-1-4-2     | Middle     | 16.28    | -24.13                                  | 0.03       | -5.32                                  |
| CUP-1-4-1     | Middle     | 16.34    | -22.97                                  | 0.04       | -5.34                                  |
| COO-1-15-2    | Owl Congl. | 16.83    | -23.73                                  | 0.04       | -5.40                                  |
| RDQ-1         | Owl Congl. | 17.11    | -23.57                                  | 0.02       | -5.44                                  |
| OC-1-4        | Owl Congl. | 17.14    | -25.11                                  | 0.06       | -5.44                                  |

|           |            |       |        |      |       |
|-----------|------------|-------|--------|------|-------|
| LB-1-5    | Calico     | 17.18 | -22.34 | 0.16 | -5.44 |
| OC-1-15-2 | Owl Congl. | 17.29 | -23.66 | 0.04 | -5.49 |
| OC-1-3    | Owl Congl. | 17.29 | -22.05 | 0.03 | -5.59 |
| OC-1-1B   | Owl Congl. | 17.34 | -22.92 | 0.04 | -5.51 |
| LB-1-9    | Calico     | 17.55 | -20.39 | 0.05 | -5.61 |
